# Supplementary material for: Enhanced photoreduction degradation of polybromodiphenyl ethers with Fe3O4-g-C3N4 under visible light irradiation
Source: Royal Society of Chemistry journal article supplement (doi:10.1039/c8ra01356j), 2018-01-01
Supplement: c8ra01356j1.pdf [file c8ra01356j1.pdf]

## **Enhanced photoreduction degradation of polybromodiphenyl ethers with Fe<sub>3</sub>O<sub>4</sub>-g-C<sub>3</sub>N<sub>4</sub> under visible light irradiation**

Yingying Shao<sup>a</sup>, Weidong Ye<sup>a</sup>, Chunyan Sun<sup>a\*</sup>, Chulin Liu<sup>a</sup>, Qi Wang<sup>b</sup>, Chuncheng Chen<sup>c</sup>,  
Jiayun Gu<sup>a</sup>, Xiaoqing Chen<sup>a</sup>.

<sup>a</sup>*Department of Chemistry, Shaoxing University, Zhejiang Shaoxing 312000, China*

<sup>b</sup>*School of Environment Sciences and Engineering, Zhejiang Gongshang University, Hangzhou, China*

<sup>c</sup>*Beijing National Laboratory for Molecular Sciences, Key Laboratory of Photochemistry, Institute of Chemistry, Chinese Academy of Sciences, Beijing 100190, China*

---

\*Corresponding author: E-mail: [sunchunyan@usx.edu.cn](mailto:sunchunyan@usx.edu.cn); Tel/Fax: 86-0575-8834-1521,

## Supplementary materials

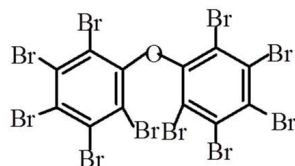

Fig. S1. The structure of BDE209

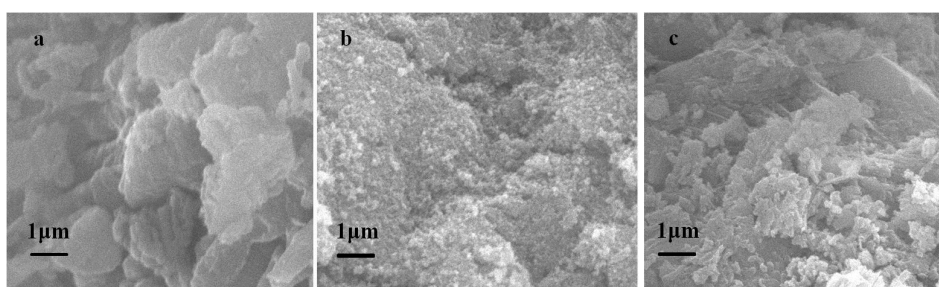

Fig. S2 SEM images of (a)g-C<sub>3</sub>N<sub>4</sub>; (b) Fe<sub>3</sub>O<sub>4</sub>; (c) FeOCN-4

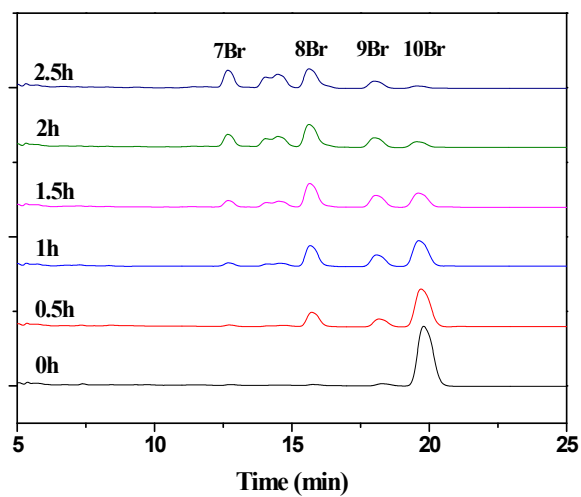

Fig. S3 HPLC chromatograms of degradation products of BDE209 with FeOCN-4 in different irradiation times.

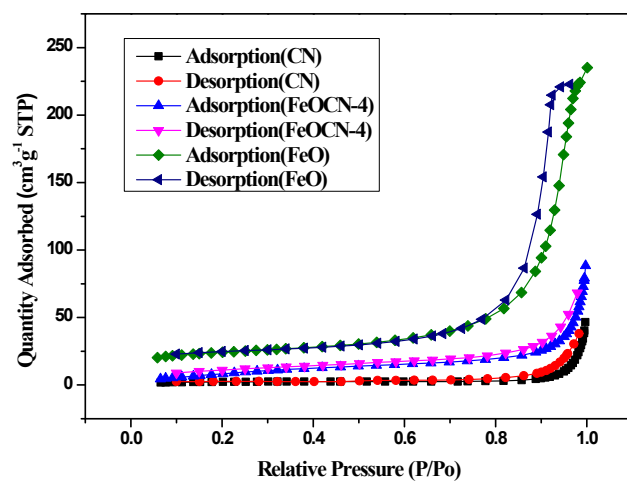

Fig. S4 Nitrogen adsorption isotherms of pure  $g\text{-C}_3\text{N}_4$  (CN),  $\text{Fe}_3\text{O}_4$  (FeO) and FeOCN-4.

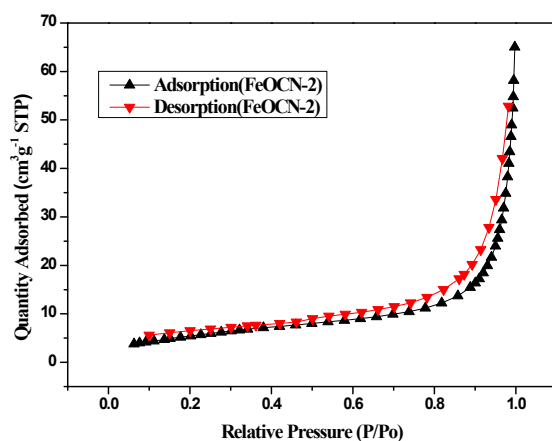

Fig. S5 Nitrogen adsorption isotherms of FeOCN-2.

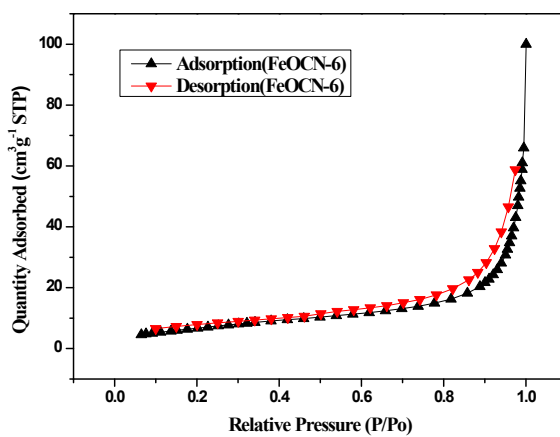

Fig. S6 Nitrogen adsorption isotherms of FeOCN-6.

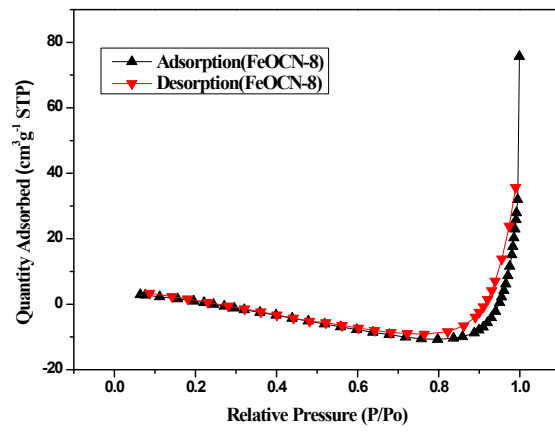

Fig. S7 Nitrogen adsorption isotherms of FeOCN-8.

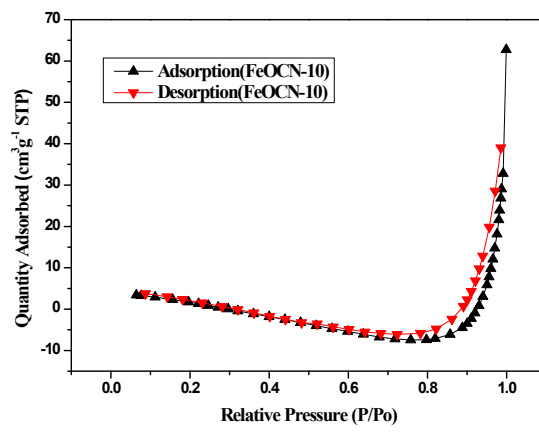

Fig. S8 Nitrogen adsorption isotherms of FeOCN-10.
